# Supplementary material for: The 1,3 migration of a methyl group in reactions of the trisyl iodide (Me3Si)3CSi(CD3)2I and related iodides with silver salts in 2,2,2-trifluoroethanol. Refinement of the mechanism
Source: Royal Society of Chemistry journal article supplement (doi:10.1039/b204130h), 2002-01-01
Supplement: b204130h.doc [file b204130h.doc]

**Supplementary data**

**The 1,3 migration of a methyl group in reactions of the trisyl iodide (Me3Si)3CSi(CD3)2I and related iodides with silver salts in 2,2,2-trifluoroethanol. Refinement of the mechanism**

## Colin Eaborn, Duncan A. R. Happer,* Jarrett R. Black and Philip M. Garrity

# NMR Chemical Shifts

The NMR chemical shifts in Tables S1 – S3 were used to analyse the composition of the reaction products obtained. The method used is described later.

| **Table S1. NMR Chemical Shifts (ppm) of TsiSiMe2X** | | | | | | | | | |  |
| --- | --- | --- | --- | --- | --- | --- | --- | --- | --- | --- |
| X | | **Tsi** | | | **SiMe2X** | | | **X** | |  |
| F | | 0.24 | | | 0.39 (j = 7.8) | | |  | |  |
| I | | 0.34 | | | 1.07 | | |  | |  |
| OH | | 0.24 | | | 0.33 | | |  | |  |
| OMe | | 0.21 | | | 0.25 | | | 3.47 | |  |
| OEt | | 0.22 | | | 0.25 | | | 1.17, 3.60 (J = 6.8) | |  |
| Otfe | | 0.23 | | | 0.32 | | | 3.86 (J = 8.8) | |  |
| OAc | | 0.25 | | | 0.54 | | | 2.05 | |  |
| Otfa | | 0.27 | | | 0.62 | | |  | |  |
| Omes | | 0.29 | | | 0.67 | | | 3.00 | |  |
| Otos | | 0.17 | | | 0.65 | | | 2.43 | |  |
| Otfl | | 0.29 | | | 0.71 | | |  | |  |
| OClO3 | | 0.28 | | | 0.71 | | |  | |  |
| ONO2 | | 0.29 | | | 0.64 | | |  | |  |
| **Table S2. NMR Chemical Shifts (ppm) used for the Analysis of Reaction Products of TsiSiEt2I with AgOMs** | | | | | | | | | | |
| **TsiSiEt2X** | | | | **(Me3Si)2C(SiEt2Me)SiMe2X** | | | **(Me2EtSi)2C(SiMe3)SiEtMeX** | | | |
| X | Tsi | | X | SiMe2X | | X | SiEtMeX | | X | |
| I | 0.35 | |  |  | |  |  | |  | |
| OMe |  | | 3.56 |  | | 3.34 |  | |  | |
| OEt |  | | 3.83  (J = 6.8) |  | | 3.60  (J = 6.8) |  | | 3.65-3.75a  (v. weak) | |
| OCH2CF3 |  | | 4.09  (J = 8.8) |  | | 3.87  (J = 8.8) |  | | 3.9-4.0a  (br m) | |
| OMs |  | | 3.04 | 0.67 | | 3.00 | 0.67 | | 3.01 | |

aTwo overlapping quartets. The shifts could not be determined reliably

| Table S3. NMR Chemical Shifts (ppm) used for the Analysis of Reaction Products of TsiSiEt2I with AgOMs | | | | | |
| --- | --- | --- | --- | --- | --- |
| TsiSiEtMeX | | | | (Me2EtSi)2C(SiMe3)SiEtMeX | |
| X | Tsi | SiEtMeX | X | SiMe2X | X |
| –I | 0.35 |  |  |  |  |
| –OMe |  |  | 3.35 |  | 3.45 |
| –OEt |  |  | 3.705a  (J = 7.0) |  | 3.605  (J = 7.0) |
| –OCH2CF3 |  |  | 3.95 |  | 3.86  (J = 8.8) |
| –OMs |  | 0.67 | 3.01 | 0.66 | 3.00 |

**Analysis of Product Mixtures.**

**1. Reactions of TsiSi(CD3)2I with AgX in alcohols**

(a) In 2,2,2-Trifluoroethanol

The major reaction products were TOtfe, T'Otfe, TX, and T'X. Small amounts of silanol were normally present, and occasionally, residual iodide, some of which was the rearranged isomer. The yields of the various compounds were determined, after assignment of the spectrum, by integration of appropriate peaks. In the first instance the total yields of each compound (both rearranged and unrearranged were determined by comparing the relative contributions of their SiMe3 and SiMe2 peaks to the total. In the case of the trifluoroethoxides and where X contained a methyl group (OSO2Me, OSO2C6H4-*p* and OCOMe) it was possible to cross-check the relative total yields by comparing the integrals for these. This method was considered more reliable than one based on the use of the (Me3Si)3C groups, since the peaks for the former were widely separated from others. Partitioning the total trifluoroethoxide into its two components was achieved by comparing the area of the SiMe2 peak of the SiMe2OCH2CF3 with that of the methylene hydrogens of the trifluoroethoxy. This was preferred to comparison with the Tsi group because the latter tended to overlap partly with the (Me3Si)3C group of TOH. Where there were no overlap problems the two methods gave very similar results. The same approach was adopted for partitioning the total yield of TX. If X was OAc, Omes, or Otos, the area of the methyl group of X was compared with that of the SiMe2 of SiMe2X. For other X, the associated (Me3Si)3C peak was used instead. Where iodide remained, the extent to which this was rearranged was determined from the relative areas of the (Me3Si)3C and SiMe2I peaks. This figure was unreliable because the iodide Tsi peak was broad, making its area difficult to measure accurately, and normally residual iodide was a minor component of the product mixture. The hydroxide products could not be partitioned into rearranged and unrearranged components because the peak from the Me groups of the SiMe2OH linkage overlapped with the much larger SiMe2 peaks of the trifluoroethoxides.

(b) In Methanol and Ethanol

Analyses of the product of these reactions utilised the same approach as that for those in trifluoroethanol. Partitioning the the ethoxides and methoxides into their components was made more difficult (and less reliable) by the shifts for their SiMe2 groups lying rather close to the Tsi of any TOH present (and, for the reaction in trifluoroethanol-methanol, he Tsi of the trifluoroethoxide peak.) On some occasions the 500Mhz instrument partly resolved the hydrogens on alkoxy groups into those due to SiMe2OR and those due to Si(CD3)2OR, but not sufficiently for this to form the basis of an analysis.

**2. Reactions of TsiSiEt2I with AgX in alcohols**

(a) In 2,2,2-Trifluoroethanol

TsiSiEt2I reacted equally readily with silver mesylate when subjected to the general procedure used for TsiSi(CD3)2I, but determination of the product yields was more difficult. In TsiSiEt2I the methylene hydrogens of the ethyl groups are diastereotopic, and give rise to two broad multiplets around 1.10 ppm and 1.30 ppm. The associated methyl peaks are observed as tripletsfound between 1.05 ppm and 1.10 ppm. The main products were the alkoxides (Me3Si)3CSiEt2Otfe and (Me3Si)2 (Et2MeSi)CSiMe2Otfe. Unfortunately, in the signals from the ethyl groups of the latter, the methyl and methylenes appear as multiplets with similar chemical shifts, and span a broad range between 0.7 ppm and 1.4 ppm. As the ethyl signals from the other products also fall in this region, assignments of the various peaks was not feasible and the peaks could not be used to determine the yields of the various products. In addition, the SiMe3 peaks for Et2MeSiC(SiMe3)2 overlapped virtually completely with those of the corresponding Tsi compounds. The first problem in the analysis was ascertaining to what extent the four expected products (unrearranged and rearranged trifluoroethoxide and mesylate) could account for all, or nearly all of the iodide consumed. This could clearly not be done by comparison of the areas of the various SiMe and SiEt peaks. The relative yields of the four could, however be determined readily from the relative areas under the various trifluoroxide, methylene, and mesylate methyl peaks. As some potential products (e.g. silanols) would not be detected by this means, it was necessary to confirm that they were either absent or formed in only small amounts. This was done by having some TsiSiEt2Cl present in the reaction as an internal standard and carrying out a mass balance. Identification of the individual isomers was made easier by the observation the chemical shifts of the methylenes in the trifluoroethoxy groups and methyls of the mesylates appeared depended mainly on the two alkyl groups on the silicon linked to Otfe or Omes, and were independent of the structure of the tris(trialkylsilyl)methyl group. Three multiplets were present in the OCH2CF3 region, rather than the two expected. The two larger ones consisted of quartets centred around 3.87 ppm (J = 8.8Hz) and 4.09 ppm (J = 8.8Hz). Between them lay a smaller multiplet centred at 3.95ppm with a structure suggesting that it originated from a trifluoroethoxy group bearing two diastereotopic hydrogens. Since the OCH2CF3 quartet from (Me3Si)3CSi(CD3)2Otfe appears at 3.86p pm with J = 8.8 Hz, and that at 3.87 ppm was of substantially greater area than that at 4.09ppm, it was concluded that the two larger quartets corresponded to the methylenes of the OCH2CF3 groups linked to SiMe2 and SiEt2, respectively. The multiplet lying between these was assigned to a trfluoroethoxide in which the OCH2CF3 was linked to a SiEtMe group. (This assignment was supported when the products from the reaction of (Me3Si)3CSiEtMeI were subsequently investigated as described below). For the compounds containing OMs a similar approach was adopted. In this case, assignment of the peaks was also based on their chemical shifts. In (Me3Si)3CSi(CD3)2Omes the signal from the methyl of the OMs group is at 3.00 ppm. In the product from TsiSiEt2I there was a signal at 3.00 ppm, one of about half the magnitude at 3.04 ppm and a much smaller one at 3.01ppm. Since there were singlets at 3.00 and 3.01ppm, respectively, for the products of the corresponding reaction of (Me3Si)3CSiEtMeI (see below), the peaks at 3.04 ppm, 3.01 ppm, and 3.00 ppm were assigned to the mesylate methyls associated with SiEt2Omes, SiEtMeOmes, and SiMe2Omes, respectively. In reactions in which some iodide remained, it was not possible to identify peaks associated with either SiMe2I or SiEtMeI groups because of the large number of other peaks in the region they were expected to appear.

(b) In Methanol and Ethanol

Product analyses for the reactions of TsiSiEt2I in methanol and ethanol were based on the same approach as that used in trifluoroethanol. In methanol product there were two peaks in the methoxy region (at 3.56ppm and 3.34ppm) that could be assigned to –SiEt2OMe and –SiMe2OMe respectively. There were also two much smaller ones at 3.00 and 3.04ppm that could be assigned to the corresponding mesylates. There was no sign of peaks that could be attributed to –SiEtMeOMe or –SiEtMeOmes. In ethanol there were quartets at 3.83ppm and 3.60ppm due to –SiEt2OEt and –SiMe2OEt and singlets at 3.04ppm and and 3.00ppm assignable to the two expected mesylates. In neither solvent were there peaks present that could be assigned to –SiEtMeOR or –SiMe2Omes.

**3. Reactions of TsiSiEtMeI with AgOMs in alcohols**

(a) In 2,2,2-Trifluoroethanol

Reaction of (Me3Si)3CSiEtMeI with silver salts AgX in CF3CH2OH gave a mixture of two trifluoroethoxides and two mesylates. As in the case of the TsiSiEt2I reaction, the presence of the Et group complicated the determination of overall yields, and once again an internal standard was usedto show that the four products specified were the only ones formed in significant amounts. Individual product ratios were determined in a similar fashion. The two trifluoroethoxides gave two sets of peaks around 4 ppm arising from their methylene hydrogens. One was a quartet centred at 3.87 ppm (J = 8.6Hz) and the other a complex multiplet centred at 3.95ppm. The first was assigned to (Me3Si)2(EtMe2Si)CSiMe2OCH2CF3 and the second to (Me3Si)3CSiEtMeOCH2CF3. The position of the quartet corresponded very closely to that assigned to the corresponding signals from (Me3Si)2(CD3)2MeSi)CSiMe2OCH2CF3 and (Me3Si)2(Et2MeSi)CSiMe2OCH2CF3. The multiplet at 3.95 ppm came in the same position as that for the minor product (Me3Si)2(EtMe2Si)CSiEtMeOCH2CF3 in the TsiSiEt2I reaction, and its form was consistent with two diastereotopic hydrogens with slightly different chemical shifts on a carbon adjacent to a CF3 group. The two mesylate products gave rise to resonances , at 3.00 ppm and 3.01 ppm, of equal area. There were also two peaks at 0.66 ppm and 0.67 ppm and these were assigned to the SiMe peaks of SiEtMeOSO2Me and SiMe2OSO2Me, respectively, on the basis that the SiMe2OSO2Me peak in (Me3Si)2[CD3)2MeSi]CSiMe2OSO2Me is found at 0.67 ppm and that and in the present product the peak at 0.67 ppm has twice the area of that at 0.66 ppm.

(b) In Methanol and Ethanol

Analysis of the alkoxide products in methanol and ethanol involved the same procedures used in the trifluoroethanol reaction. In methanol the two alkoxides showed as sharp singlets at 3.45ppm (–SiEtMeO*Me*) and 3.35ppm (–SiMe2O*M****e***). In ethanol, the ethoxide methylenes appeared as a quartet at 3.605ppm (–SiMe2OC*H*2CH3) and two almost entirely overlapping quartets at 3.705ppm (–SiEtMeOC*H*2CH3). The mesylate analysis was as for the trifluoroethanol reaction.

**The Reliability of the Measurements.**

The absolute reliability of the values obtained was not easy to assess, as a number of factors were involved. The measurements made were of areas under peaks in the NMR spectrum. Problems that could arise in converting these areas to yields were:

(a) the relative areas may not be directly proportional to the numbers of hydrogens present.

(b) there were occasional problems with partial or complete overlap of peaks for different compounds.

(c) low concentrations present led to low signal to noise ratios for some species.

In addition to these there is the problem of reproducibility of analyses both for the same reaction and between reactions carried out under identical conditions.

Little could be done about (a). It was assumed that while it had the potential to affect absolute yields, relative ones would be less affected, and conclusions drawn from these would remain valid. The problem of (b) was avoided where possible by selection of suitable peaks, and choice of X. (Where it was possible, peaks in the alkoxide or X were used for analysis). Partial overlap in the Tsi region (0.15 ppm – 0.35ppm) was usually handled by using cutting and weighing techniques in preference to integration. Nothing could be done about (c). Reproducibility checks showed that repeat area determinations for the same spectrum gave closely similar results. Repeat spectrum determinations likewise gave results that agreed well. The greatest variations were found in results for reactions repeated under the same conditions, and our listed yields mostly tend to reflect these. In determining PR values, the reliability for reactions of TsiSiEt2I and TsiSiEtMeI was greater, because the yields of the isomeric products could be measured independently, using resonances due to hydrogens on the OR or OMs groups. However for the TsiSi(CD3)2I reactions this was not possible. For these the reliability depended largely on how accurately the area under the –Si*Me*2X or –Si*Me*2OR could be measured. The estimates of uncertainities given in the tables represents our best assessment, when all these factors have been taken into account, with greatest weight being given to the reproducibility of the data in repeat reactions.
